# Supplementary material for: p38α MAPK regulates proliferation and differentiation of osteoclast progenitors and bone remodeling in an aging-dependent manner
Source: PubMed Central journal article supplement (PMC5382695; doi:10.1038/srep45964), 2017-04-06
Supplement: srep45964-s1.pdf [file srep45964-s1.pdf]

## **Supplementary Information**

### **p38 $\alpha$ MAPK regulates proliferation and differentiation of osteoclast progenitors and bone remodeling in an aging-dependent manner**

Qian Cong<sup>1,2#</sup>, Hao Jia<sup>3,2#</sup>, Ping Li<sup>1,2</sup>, Shoutao Qiu<sup>1,2</sup>, James Yeh<sup>2</sup>, Yibin Wang<sup>4</sup>,  
Zhen-Lin Zhang<sup>2</sup>, Junping Ao<sup>5</sup>, and Baojie Li<sup>1,2\*</sup>, Huijuan Liu<sup>1,2\*</sup>

### Supplementary Figure legends

Figure S1. p38 $\alpha$  deficiency did not affect monocyte/osteoclast apoptosis or DC-Stamp expression.

- A. TUNEL assays on p38 $\alpha$  deficient and control monocyte/osteoclast cultures. Right panel: quantitation data. Scale bar, 50  $\mu$ m. N=3.
- B. Realtime PCR results showed that p38 $\alpha$  deficient and control monocyte/osteoclast cultures showed similar levels of DC-Stamp. N=3.

Figure S2. SB203580 greatly inhibited osteoclast differentiation in p38 $\alpha$  deficient and WT monocytes.

TRAP staining of SB203580-treated WT and p38 $\alpha$  deficient monocyte cultures in the presence of M-CSF and RANKL (Upper panels). Bottom panel: Quantitation data. Scale bar, 200  $\mu$ m. N=3. P-values are based on Student's t-test. \*\*p<0.01 when the value of drugs-treated group compared to control group.

Figure S3. p38 $\beta$  knockdown did not significantly affect osteoclast differentiation.

- A. Western blot analysis showed the protein levels of p38 $\alpha$  and p38 $\beta$  in WT and p38 $\alpha$  deficient monocyte cultures.
- B. TRAP staining of WT and p38 $\alpha$  deficient monocyte cultures with p38 $\beta$  knocked down with siRNA, in the presence of M-CSF/RANKL (left panel). Upper right panel: western blot showing knockdown of p38 $\beta$  in WT and p38 $\alpha$  deficient monocytes. Bottom right panel: quantitation data for TRAP positive osteoclasts. Scale bar, 200  $\mu$ m. N=3.

Figure S4. LysM-Cre mediated p38 $\alpha$  ablation did not affect body size and weight

- A. Body weights and the lengths of limbs of 2.5-month-old LysM-Cre; p38 $\alpha$ <sup>f/f</sup> and control mice. N=8.
- B. Body weights and the lengths of limbs of 6-month-old LysM-Cre; p38 $\alpha$ <sup>f/f</sup> and control mice. N=8.

Figure S5. Histomorphometry results revealed that LysM-Cre; p38 $\alpha^{f/f}$  mice showed distinct alterations in bone mass at 2.5 and 6 month of age.

- A. A representative staining of femur bones of 2.5 month-old LysM-Cre; p38 $\alpha^{f/f}$  and control mice. Upper panel scale bar, 200 $\mu$ m. Bottom panel scale bar, 50  $\mu$ m. N=8.
- B. Two and half-month-old LysM-Cre; p38 $\alpha^{f/f}$  mice only showed a minor increase in BV/TV and a decrease in trabecular separation but not a change in trabecular number or thickness compared to control mice. N=8.
- C. A representative staining of the femur bones of 6 month-old LysM-Cre; p38 $\alpha^{f/f}$  and control mice. Scale bar, 200  $\mu$ m.
- D. Six month-old LysM-Cre; p38 $\alpha^{f/f}$  mice showed a decrease in BV/TV, trabecular number, trabecular thickness, and an increase in trabecular separation compared to control mice. N=8

For all results in Fig. S5, P-values are based on Student's t-test. \* $p < 0.05$ , \*\* $p < 0.01$  when the value of mutant mice or cells was compared to that of control mice or cells.

Figure S6. p38 $\alpha$  deficient monocytes isolated from 6-month-old mice behaved just like monocytes isolated from 2.5-month-old mice.

- A. p38 $\alpha$  deficiency increased cell proliferation in monocyte/osteoclast cultures isolated from 6-month-old mice. WT and p38 $\alpha$  deficient monocytes were induced to differentiate by M-CSF/RANKL. At day 2, these cells were immunostained for Ki67 to detect S phase cells (left panel). The ratios of Ki67 positive cells to DAPI-stained cells were used as an indicator of cell proliferation rate. Right panel: quantitation data. Scale bar, 50  $\mu$ m. N=3.
- B. TRAP staining showed that p38 $\alpha$  deficiency promoted osteoclast differentiation in low cell density culture but slightly inhibited osteoclast differentiation in high cell density cultures. Monocytes were isolated from 6-month-old LysM-Cre; p38 $\alpha^{f/f}$  and control mice, plated at different densities, and cultured in the presence of M-CSF/RANKL. After 7 days, the cultures were stained for TRAP (left panels). Right panels: quantitation data. Scale bar, 200  $\mu$ m. N=3.

C. p38 $\alpha$  deficiency did not affect resorbing activity of osteoclasts on dentine slices. WT and p38 $\alpha$  deficient monocytes were isolated from 6-month-old mice and were induced to differentiate into osteoclasts by M-CSF and RANKL for 2 days. The osteoclasts were counted and the same numbers of cells were plated onto dentine slices. After 7 days, the dentine slices were sonicated and stained with Gill's hematoxylin. Bottom panel: quantitation data. Scale bar, 200  $\mu$ m. N=3.

For all results in Fig. S6, P-values are based on Student's t-test. \*\*p<0.01 when the value of mutant mice or cells was compared to that of control mice or cells.

Figure S7. Co-culture experiments showed that p38 $\alpha$  deficient monocytes showed a decreased capacity in supporting MSC osteogenic differentiation.

A. WT MSCs were plated and 24 hrs later, monocytes isolated from 2.5-month-old WT and mutant mice were plated on top of the MSCs. These cells were co-cultured for 4 more days in  $\alpha$ MEM in the absence of M-CSF/RANKL. The suspension cells were then washed off and the MSCs were stained for ALP. Bottom panel: quantitation of ALP. N=3.

B. WT MSCs were plated and 24 hrs later, monocytes isolated from 2.5-month-old WT and mutant mice were plated on top of the MSCs. These cells were co-cultured for 4 days in  $\alpha$ MEM in the presence of M-CSF/RANKL. The suspension cells were then washed off and the MSCs were stained for ALP. Bottom panel: quantitation of ALP.

For all results in Fig. S7, P-values are based on Student's t-test. \*\*p<0.01 when the value of mutant mice or cells was compared to that of control mice or cells.

Figure S8. p38 $\alpha$  deficiency down-regulated TGF $\beta$  and IGF1 but not other coupling regulators tested in monocytes/osteoclasts.

A. p38 $\alpha$  deficiency led to a decrease in the mRNA levels of TGF $\beta$  and IGF1 but failed to affect the mRNA levels of other coupling factors tested in p38 $\alpha$  deficient monocytes/osteoclasts compared to control cells. N=3.

B. The mRNA levels of TGF $\beta$  were not altered during osteoclast differentiation



induced by M-CSF/RANKL.

C. The mRNA levels of IGF1 were not altered during osteoclast differentiation induced by M-CSF/RANKL.

For all results in Fig. S8, P-values are based on Student's t-test. \*\* $p < 0.01$  when the value of mutant cells was compared to that of control cells.

# Supplementary Figure S1

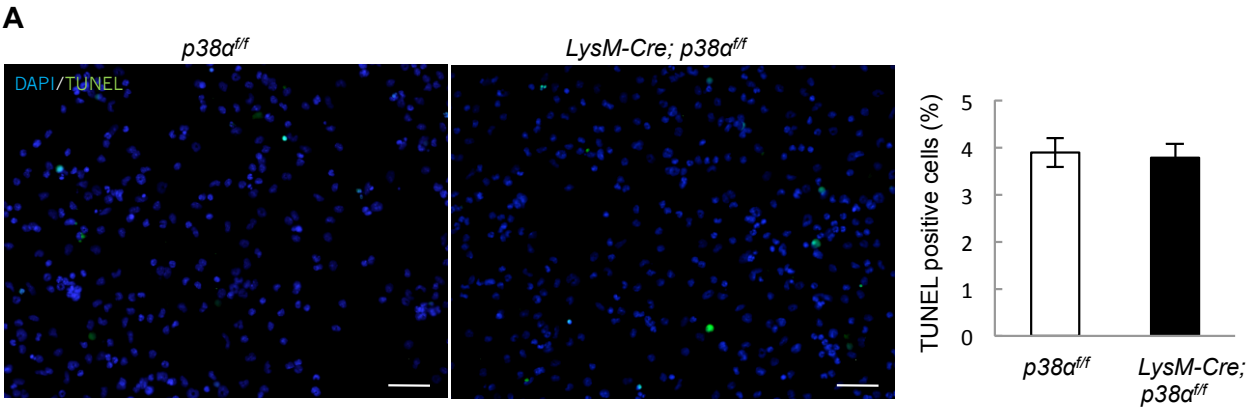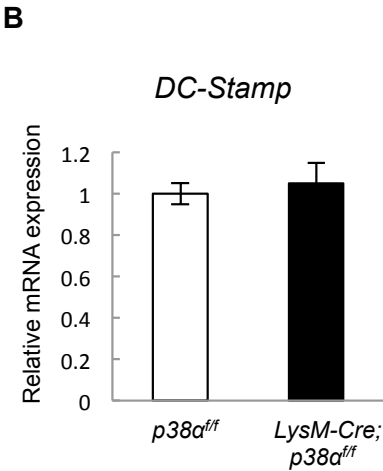

## Supplementary Figure S2

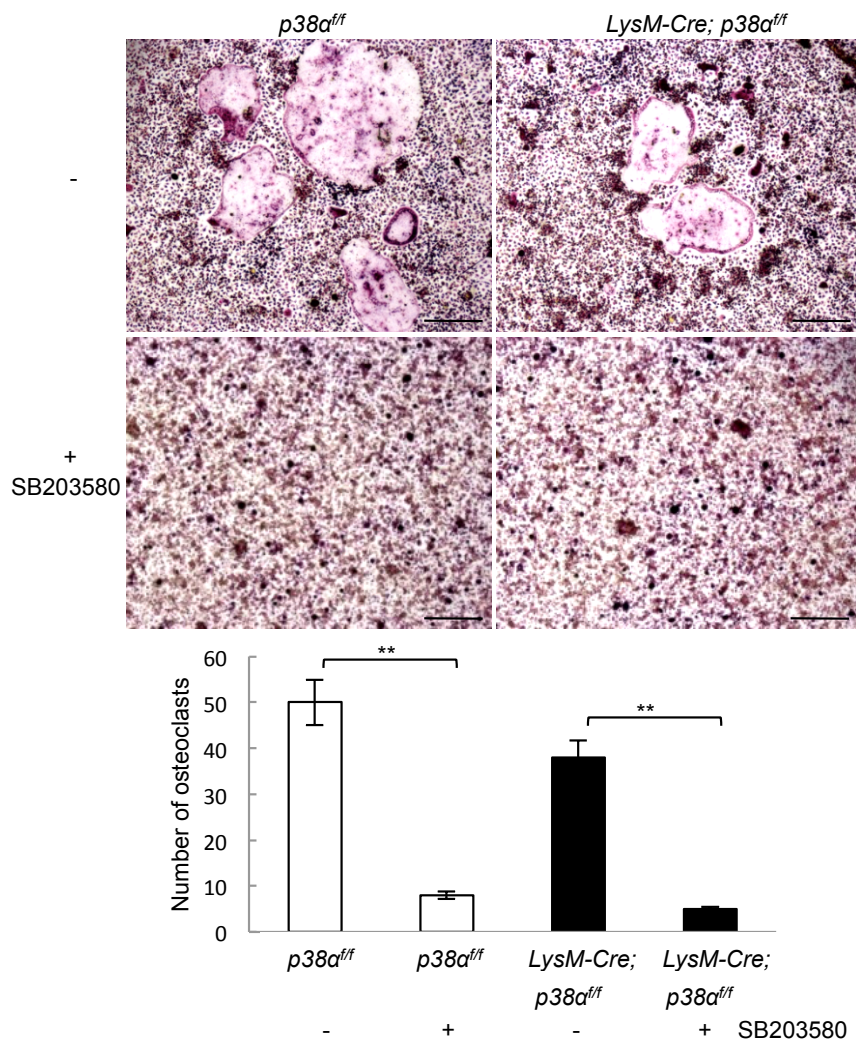

# Supplementary Figure S3

**A**

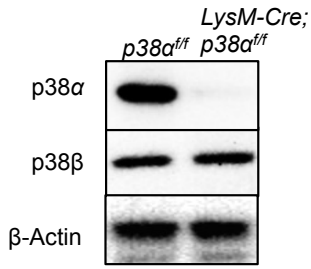

**B**

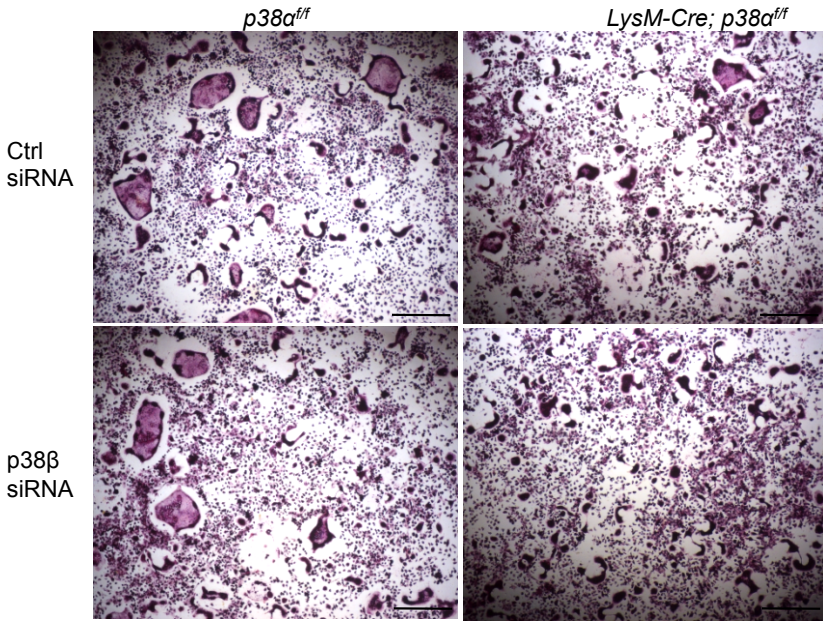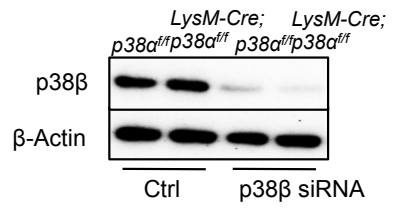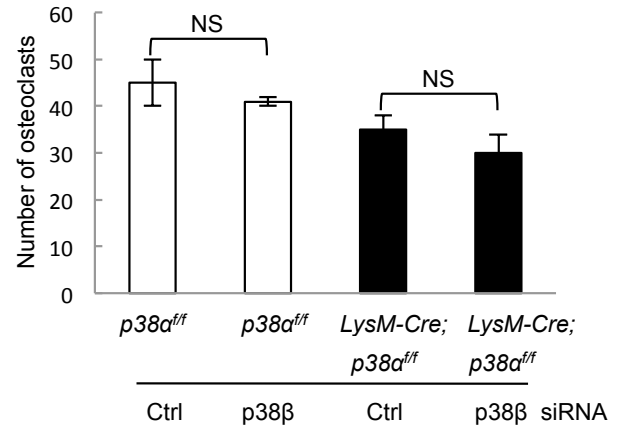

## Supplementary Figure S4

**A**

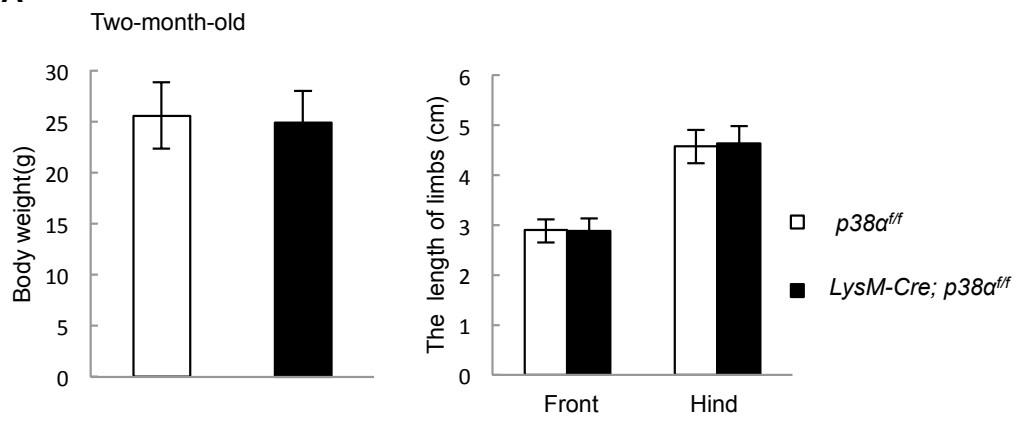

**B**

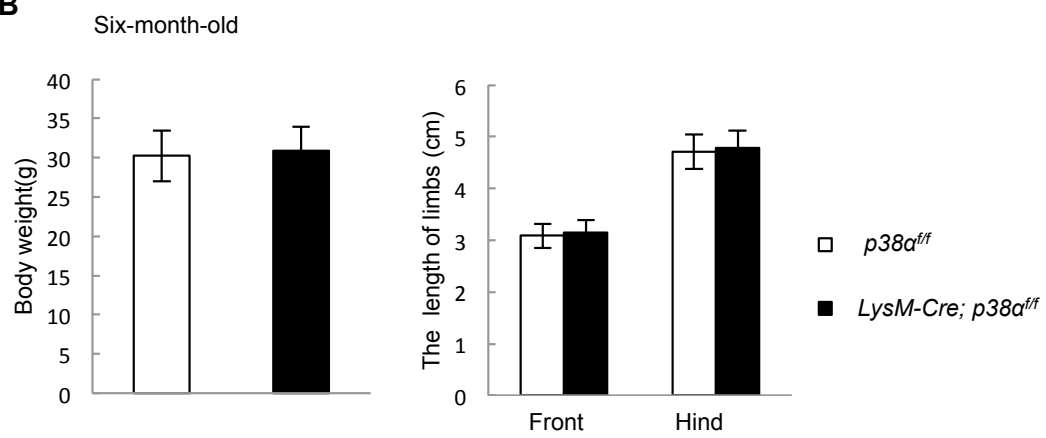



# Supplementary Figure S5

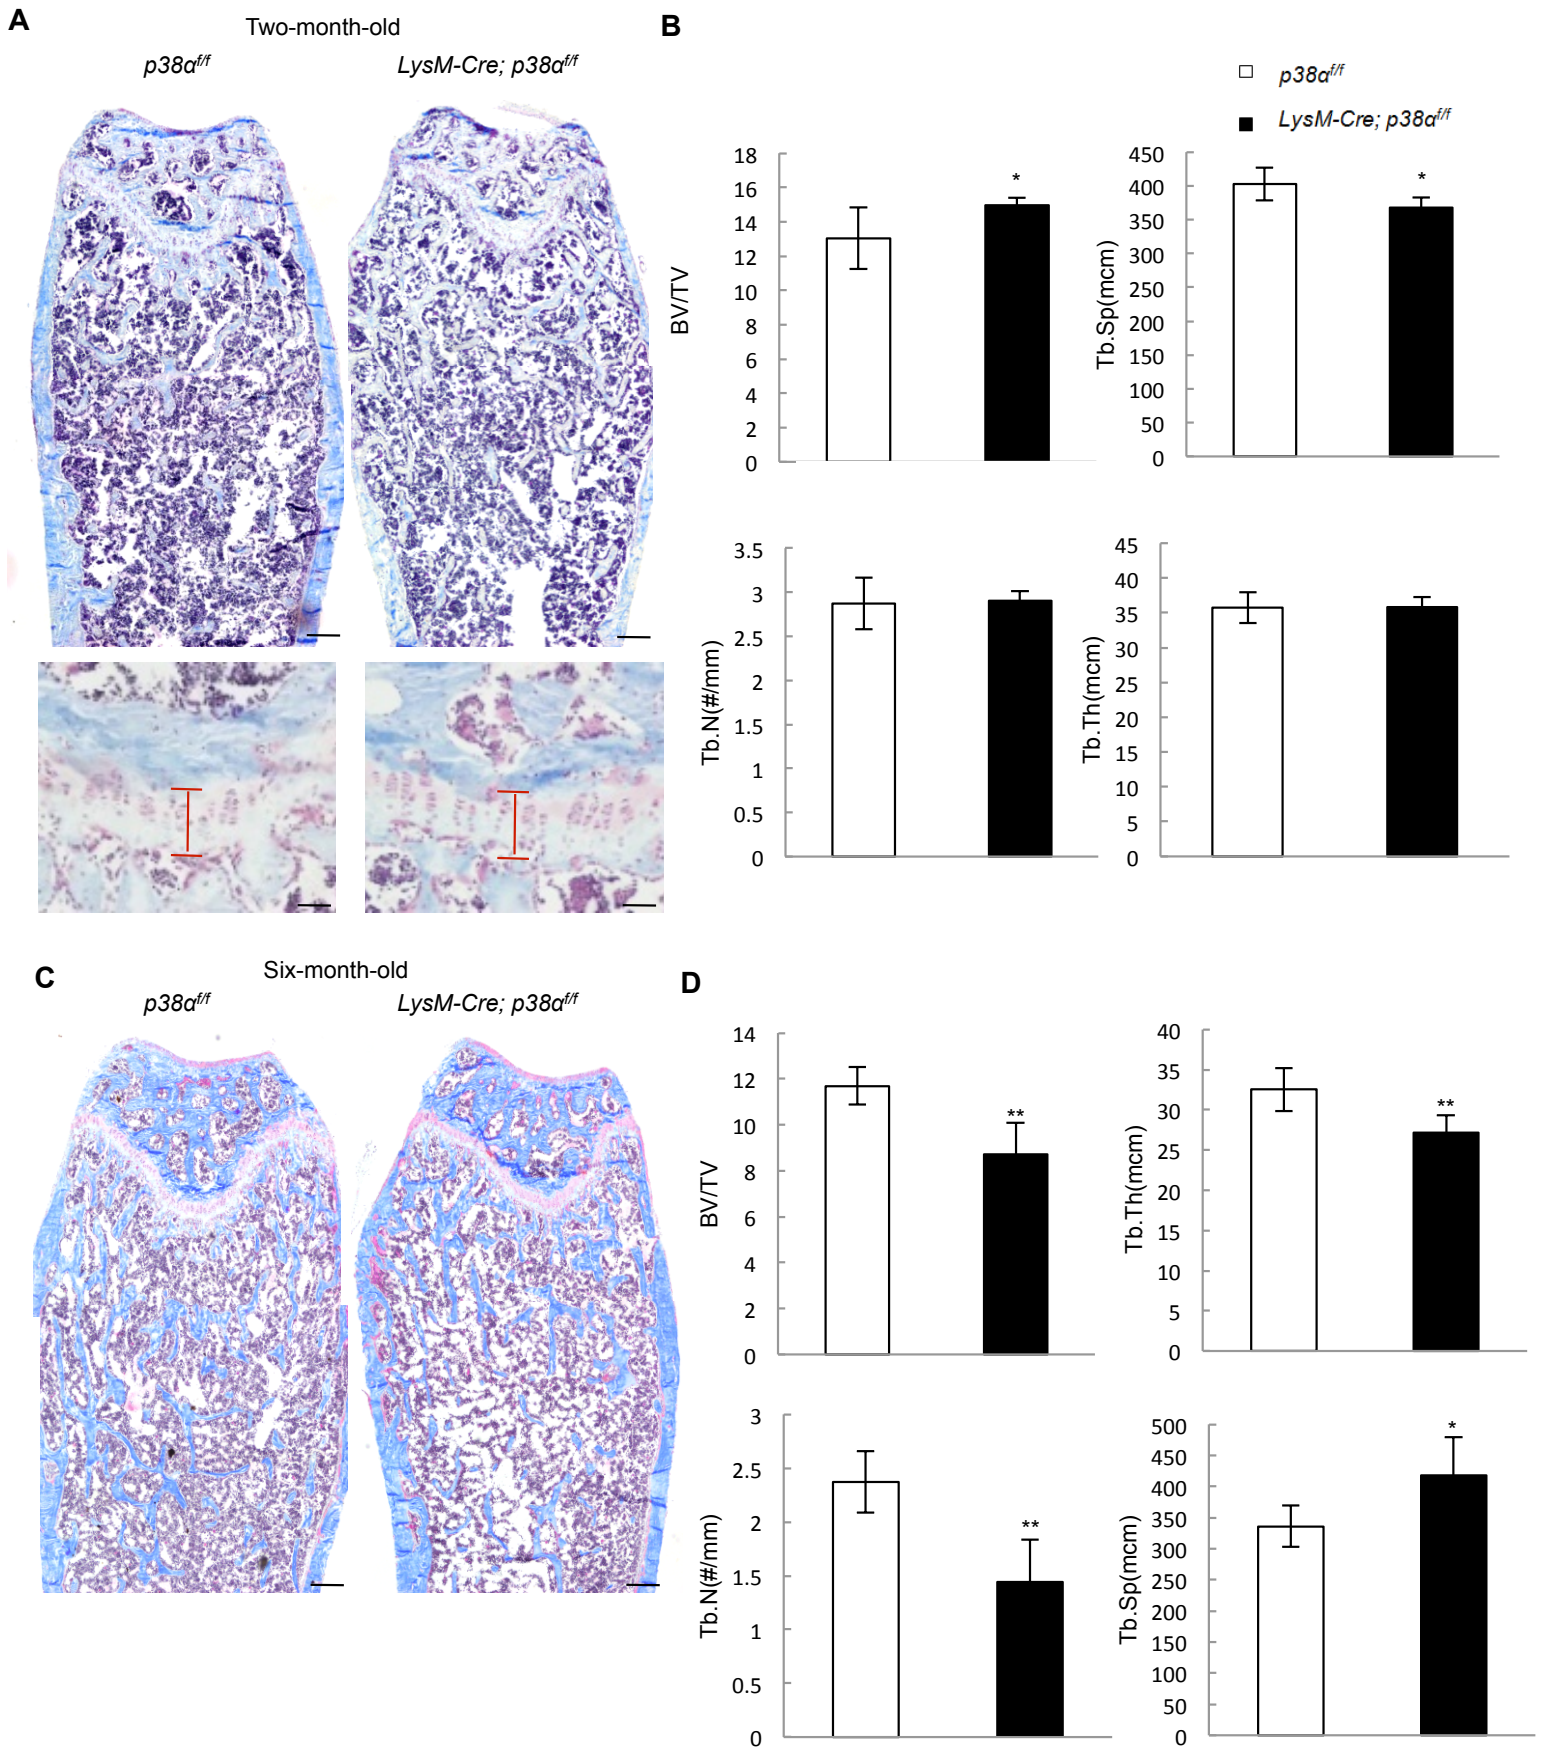

# Supplementary Figure S6

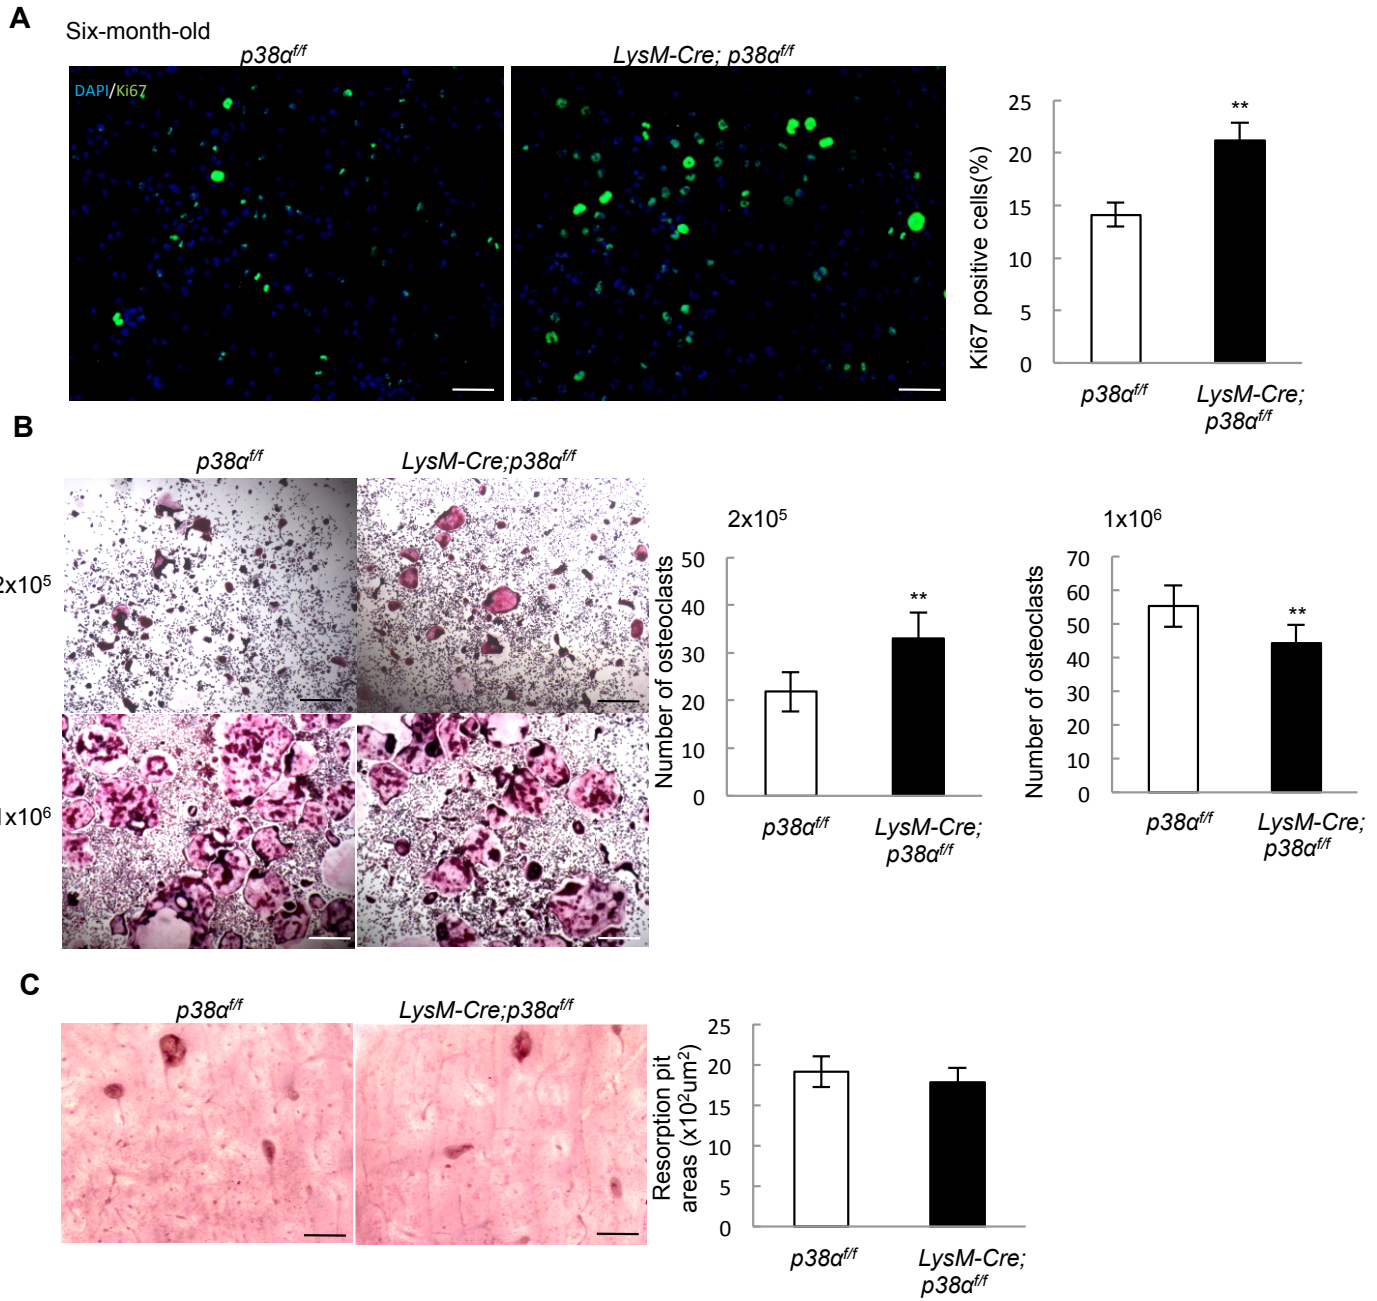

# Supplementary Figure S7

**A**

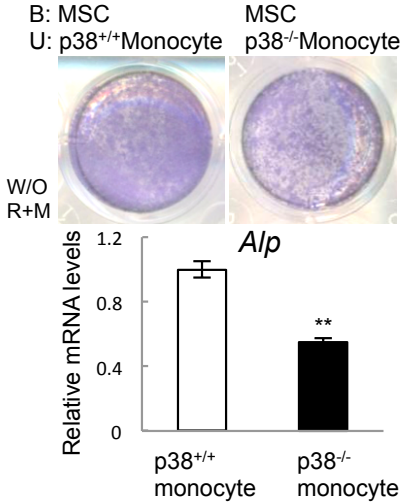

**B**

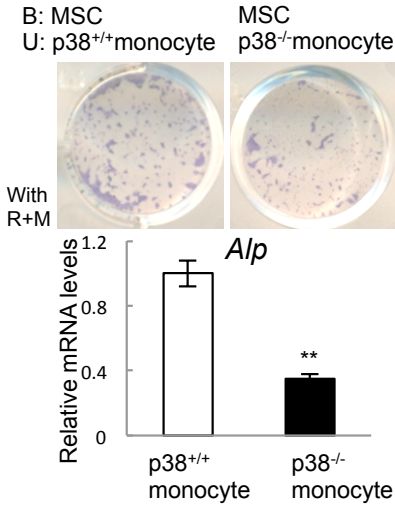



# Supplementary Figure S8

**A**

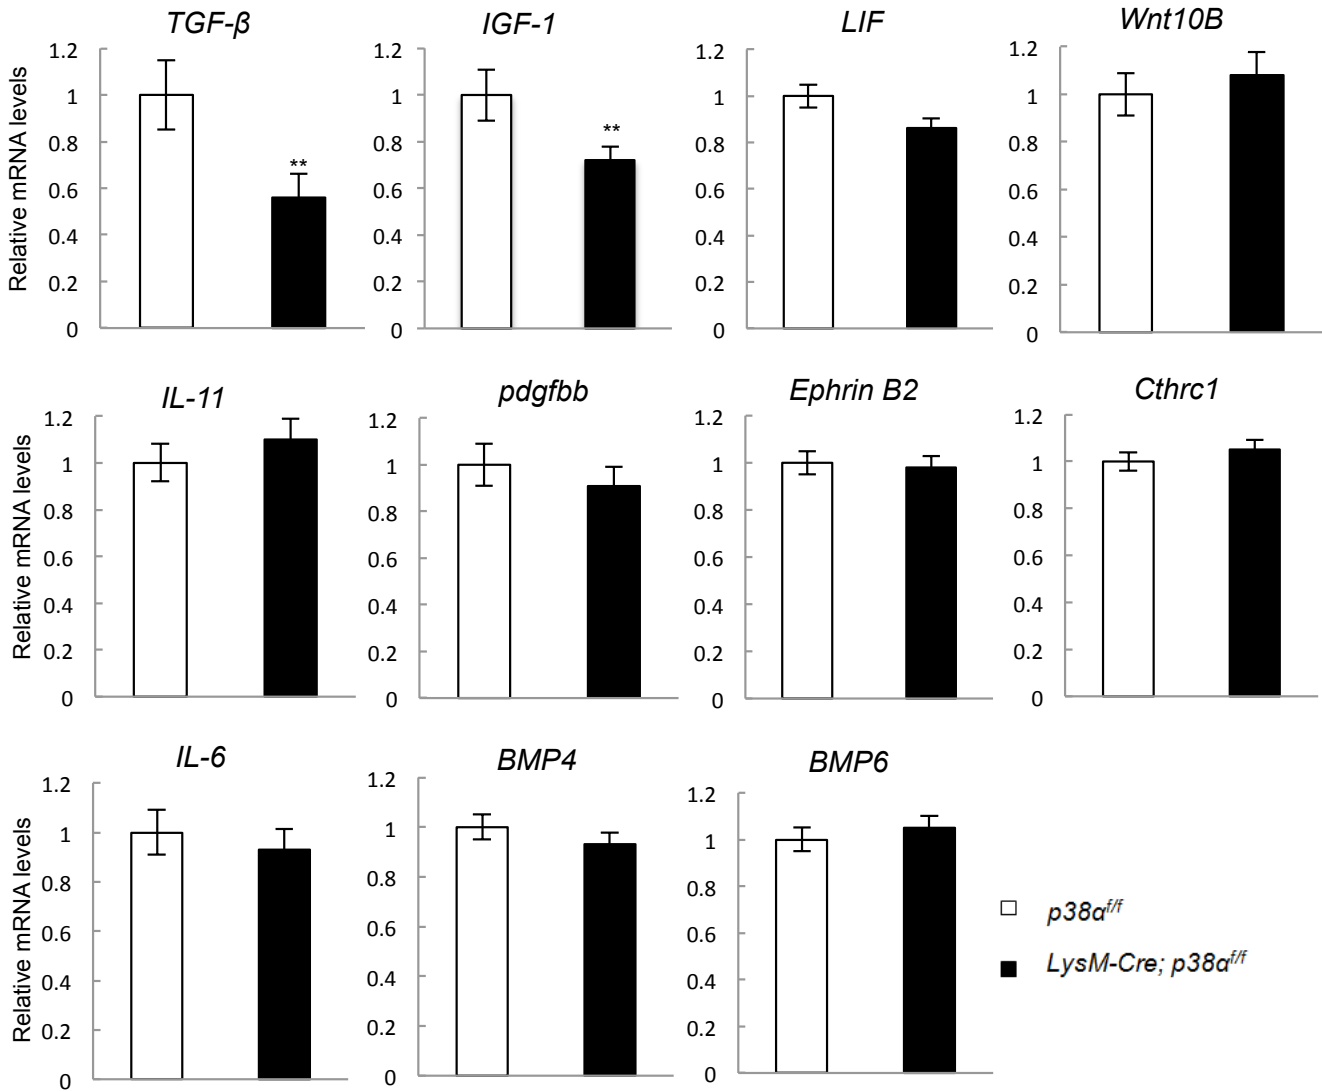

**B**

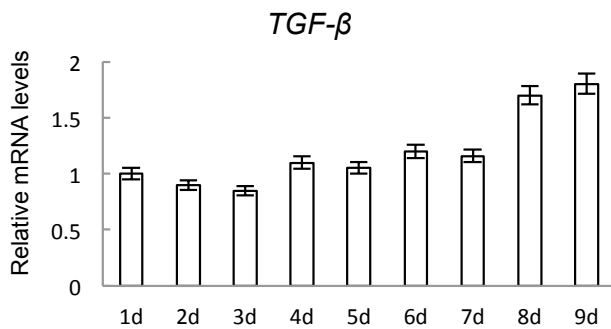

**C**

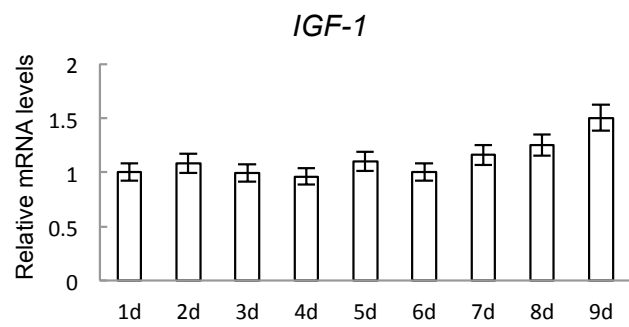

# Supplementary Figure S9

Supplementary Figure S9A The full length blots for Fig. 1A

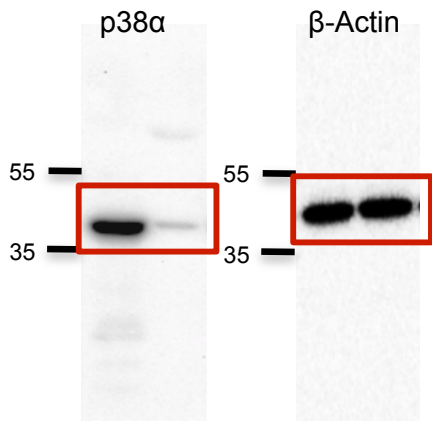

Supplementary Figure S9B The full length blots for Fig. 1D

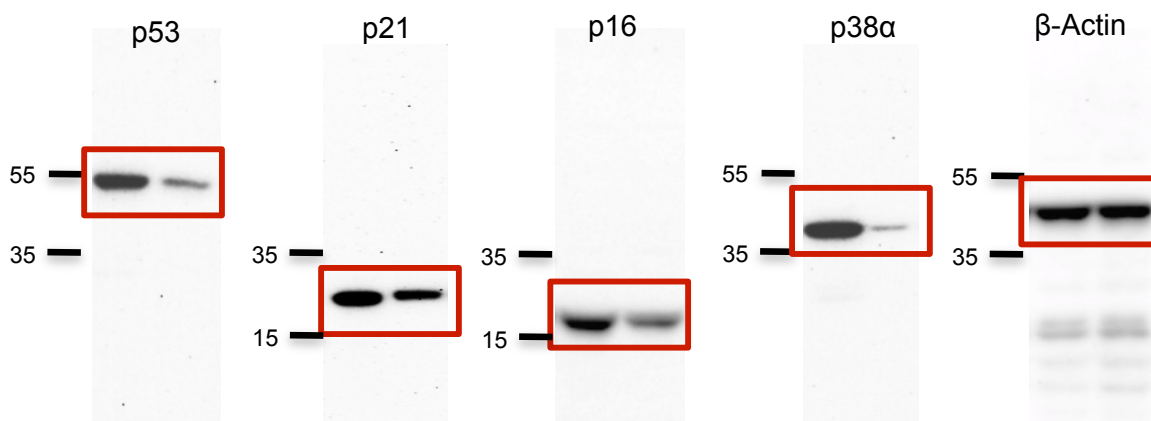

Supplementary Figure S9C The full length blots for Fig. 2D

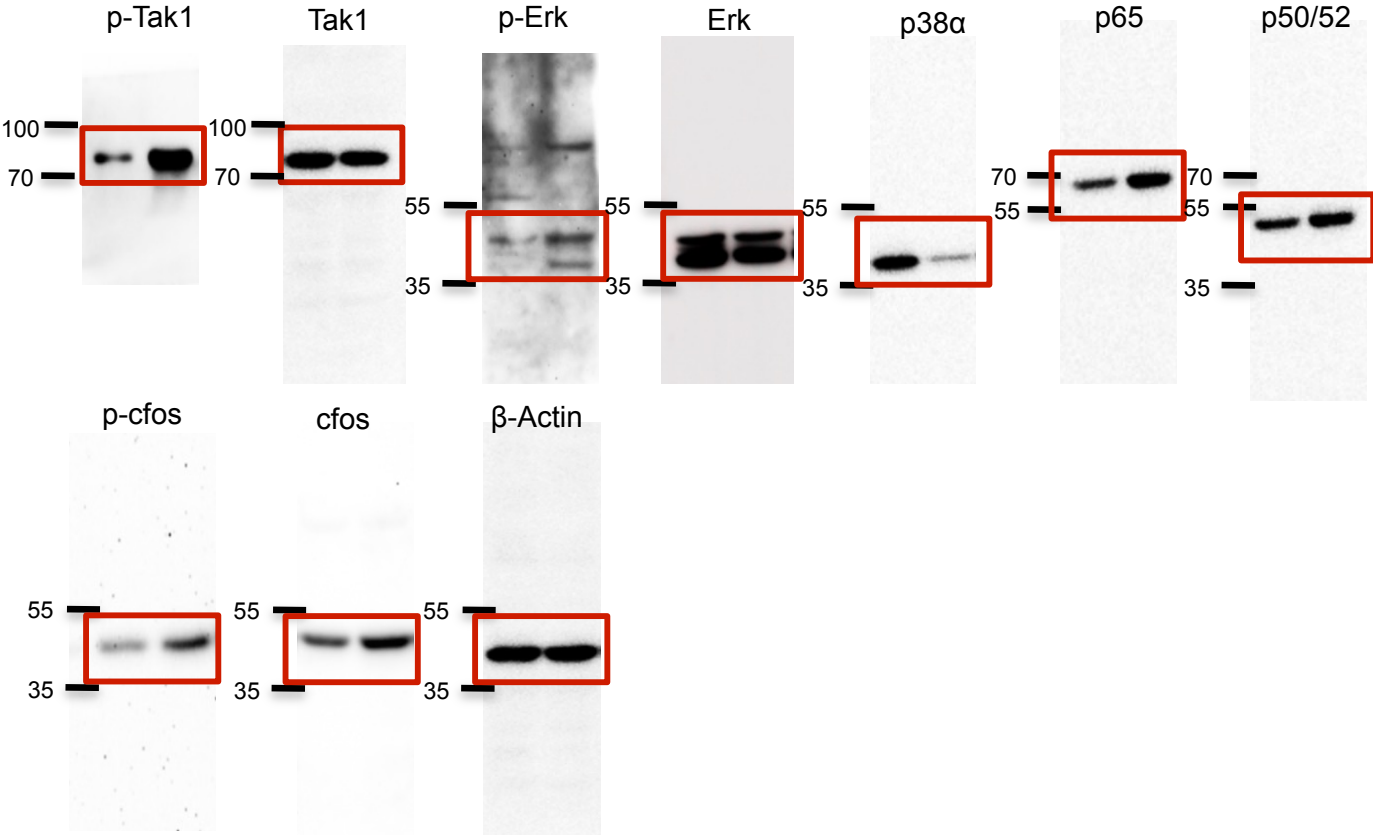

Supplementary Figure S9D The full length blots for Fig. 2E

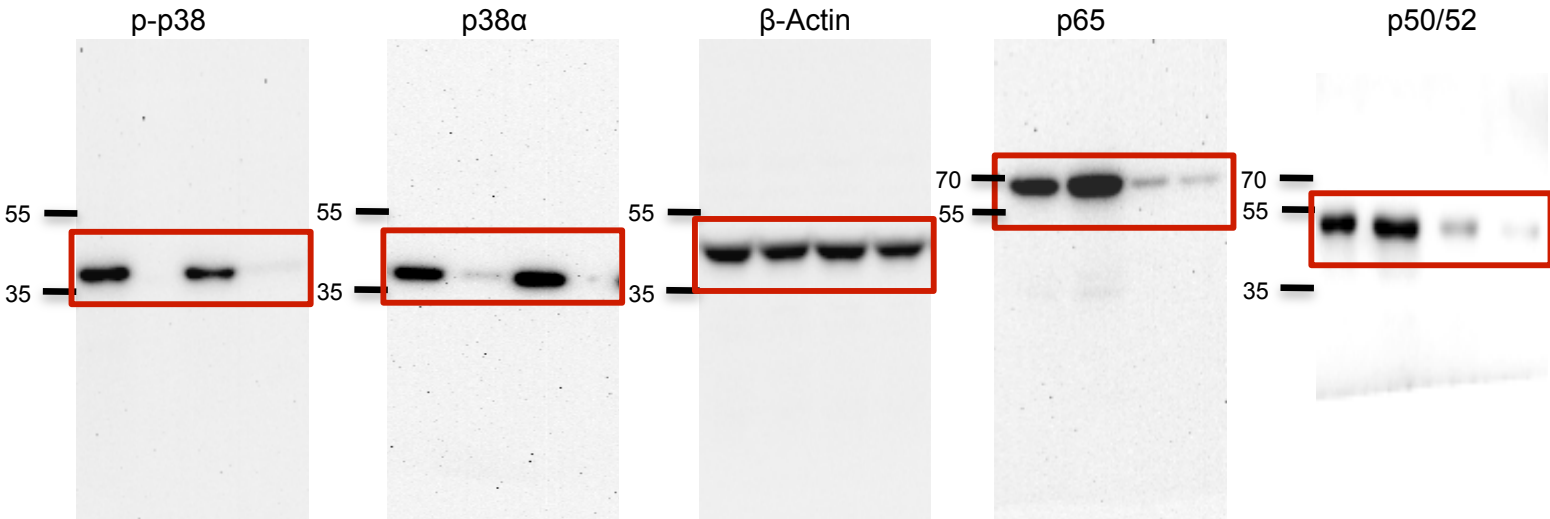

Supplementary Figure S9E The full length blots for Fig. 2F

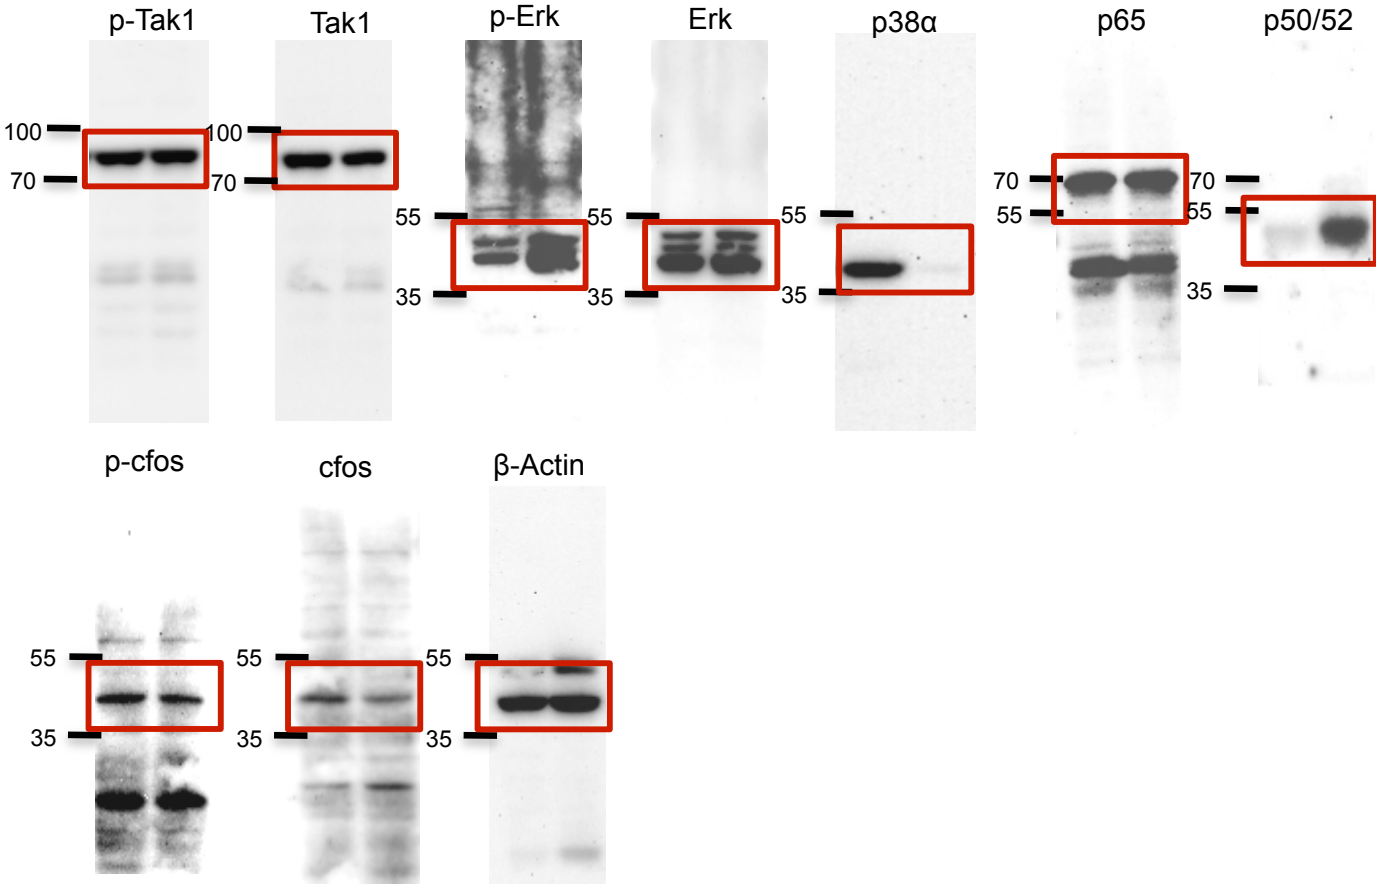

Supplementary Figure S9F The full length blots for Fig. 5C

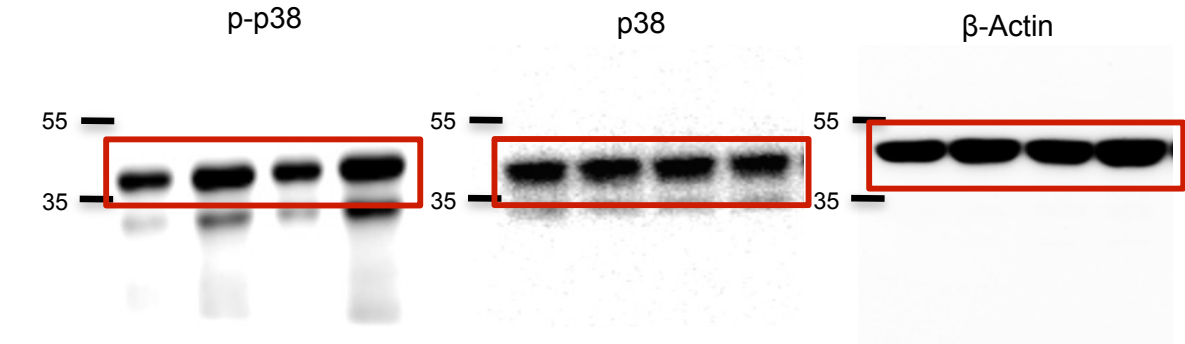

**Supplementary Figure S9G The full length blots for Fig. 7F**

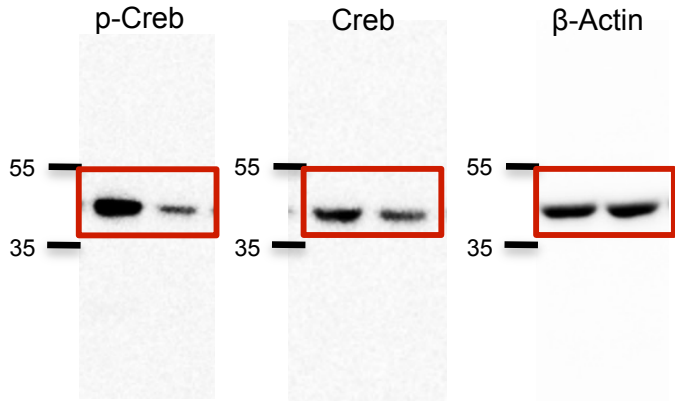

**Supplementary Figure S9H The full length blots for Fig. 7G**

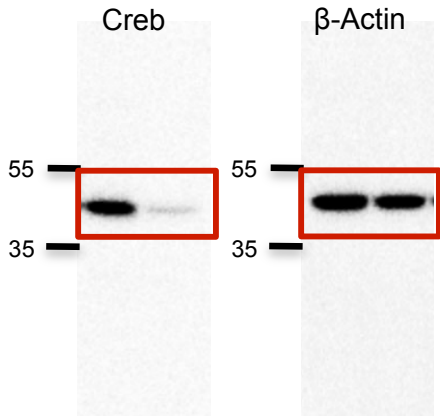

**Supplementary Figure S9I The full length blots for Supplementary Fig. S3A**

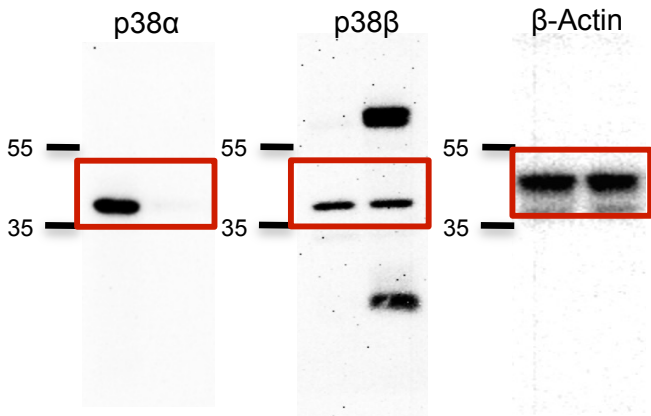

**Supplementary Figure S9J The full length blots for Supplementary Fig. S3B**

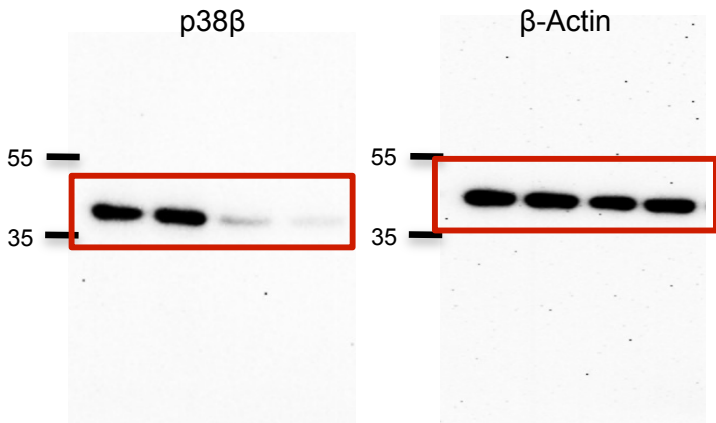

**Supplementary Table 1** Quantitative PCR primers:

| Primer             | Forword 5'-3'            | Reverse 5'-3'              |
|--------------------|--------------------------|----------------------------|
| Mitf               | CCCTCTCACCTGTTGGAGTCA    | CCGTTTCTTCTGCGCTCATAC      |
| Pu.1               | GATGGAGAAGCTGATGGCTTGG   | TTCTTCACCTCGCCTGTCTTGC     |
| c-Fos              | CCTGCCCCCTTCTCAACGAC     | GCTCCACGTTGCTGATGCT        |
| Nfatc1             | CTCGAAAGACAGCACTGGAGCAT  | CGGCTGCCTTCCGTCTCATAG      |
| Trap               | GCTGGAAACCATGATCACCT     | GAGTTGCCACACAGCATCAC       |
| Integrin $\beta$ 3 | CACCATCCACGACCGAAAAG     | GGTACGTGATATTGGTGAAGGTAGAC |
| Pdgf-aa            | GGATACCTCGCCCATGTTCTG    | AATGACCGTCCTGGTCTTGCA      |
| Pdgf-bb            | GACCACTCCATCCGCTCCTTT    | CTTGCACTCGGCGATTACAGC      |
| IGF-1              | TTTTCTATGGCAGCCTCAGTATTT | TCTCCCTCTTCTGGCAAAGTTAT    |
| Bmp2               | TGGAAGTGGCCATTTAGAG      | TGACGCTTTTCTCGTTTGTG       |
| TGF- $\beta$ 1     | AGCAACAATTCCTGGCGTTACCT  | CGAAAGCCCTGTATTCCGTCTCC    |
| IL-6               | TTGCCTTCTTGGGACTGATGCT   | GTATCTCTCTGAAGGACTCTGG     |
| LIF                | CAACCAACAACATGCGAGTG     | GGTATTGCCGATCTGTCCTG       |
| DC-Stamp           | CTAAGGAGAAGAAAACCTTG     | CAGCATAGAAGACAACAATCC      |
| Bmp4               | CGAGAAGGCAGAGGAGGAG      | CAAACCTTGCTGGAAAGGCTC      |
| Bmp6               | ATGGCAGGACTGGATCATTGC    | CCATCACAGTAGTTGGCAGCG      |
| IL-11              | GGACAGGGAAGGGTTAAAGG     | GCTCAGCACGACCAGGAC         |
| Wnt10B             | GGCTGTAACCACGACATGGAC    | ACGTTCCATGGCATTGACAC       |
| Ephrin B2          | GACGTCCAGAACTAGAAGCTGG   | CACCAGCGTGATGATGATGACG     |
| Cthrc1             | TGGACCAAGGAAGCCCTGAGT    | TGAACAGGTGCCGACCCAGA       |
| GAPDH              | CCACAGTCCATGCCATCAC      | CATACCAGGAAATGAGCTTGAC     |

**Supplementary Table 2** Chromatin immunoprecipitation (ChIP) quantitative PCR primers:

| BMP2 Primer    | Forword 5'-3'           | Reverse 5'-3'           |
|----------------|-------------------------|-------------------------|
| 0—101site      | aagtctctgtattgtttcttc   | taaataaattctctgttctttg  |
| -101—201site   | aactggattcacttctaggtcc  | atttctctgaagagcactcagac |
| -201—301site   | tgcccaaacctgaggaaagt    | cagttactccaccttgggtgtg  |
| -301—401site   | tccagaggcatccattttacct  | gccttgcagctttgggcctctg  |
| -401—501site   | attgttgatgtcatcaccaaag  | aatgagaaagttgcctttaatg  |
| -501—601site   | taaattcctataggttcggag   | ttcctccctatcaagtttaat   |
| -601—701site   | atggcttcagaggcgatcagcc  | gtcactctgaatcatgagacac  |
| -701—801site   | aactctgcaacacgttttaa    | aggaaggctgtctacaagggaa  |
| -801—901site   | tcaaaaataccttatttgacct  | aactctaggttcgttccactaa  |
| -901—1001site  | atfttagctccccgactgaaaa  | ctttccagtttgc aaagcaaag |
| -1001—1101site | atctggttcacaacgtaacgtt  | ttcatagtaccaccactggcta  |
| -1101—1201site | ggctctctaatgtaggagaaa   | tgccaagccagttttcttct    |
| -1201—1301site | cagccagagccttactgctgga  | actccagagtcaggttaacaaga |
| -1301—1401site | agggtgggtgtggaagggaagat | tgtgtccatgtgaggggacaat  |
| -1401—1501site | cacacacacacacacacacaca  | attataaaaatacgggtacagg  |
| -1501—1601site | ttacataaaataacacata     | tgagtgcattattacattttat  |
| -1601—1701site | gatgtgtatcggctatttctcg  | acagaacttacaagttattaga  |
| -1701—1801site | tctcttttaaatgtctctta    | ctagggcaaatccagagtcacc  |
| -1801—1901site | tctcccagctgtggcgcgcg    | gagcggggcgggggcgagcgcg  |
| -1901—2001site | caccgcggccgccccgtagggc  | aacacctccccctcggagcgc   |

| PDGF-AA Primer | Forword 5'-3'           | Reverse 5'-3'          |
|----------------|-------------------------|------------------------|
| 0—101site      | tcccaggtgttagggctgggg   | gtggggggaggggtagctgaa  |
| -101—201site   | gcccaccaggtatttgagcta   | ggagcctttcatccccagcttc |
| -201—301site   | tgcccggctgcgctttgtctg   | gtccagttcactcctttcatg  |
| -301—401site   | aggctgtatccagttgcatccc  | aaaggtccacaatccttaacc  |
| -401—501site   | cgagttaaggagctgacaggac  | gaagtctgatcagggtcggacg |
| -501—601site   | tgtccgatgtgccttccccgc   | aggaactcctgggttctactft |
| -601—701site   | caccagccgctcttttctatc   | ctgcaccctccagatccttagc |
| -701—801site   | ggtgtcaagggtggcgtgagggc | tgggacacctgattgaggaact |
| -801—901site   | ggctttggctctggggcgcggg  | agggggagtgagtctttgcgga |
| -901—1001site  | ccttttatggagaggggaaggc  | gcca aaaaggcatgagagctg |
| -1001—1101site | gcagcagctctggcgctgccc   | ggcggggaggggagggagccgc |
| -1101—1201site | cggtgcgcgaggttgcagctg   | cggcgcccgggctcggagccc  |
| -1201—1301site | agcttgatggatgtagctgcc   | gaagcgtcaggggtctcggcg  |
| -1301—1401site | cgaggtgcgggtccccgggccc  | cggccggcgacaggaggggggt |
| -1401—1501site | gtccacacgcgctctctcgg    | gcagcagccgcgggaagaccag |
| -1501—1601site | tgcggcggcagcggcgccagct  | cgcgcccttggcagcagccta  |
| -1601—1701site | gcccgggagctgcccggcccc   | ggcggggcccggcgctcgtct  |
| -1701—1801site | gtctggggcgccgctgcccc    | cctcctctccttggggctc    |
| -1801—1901site | cggtagctgtaccgggcccag   | ttgctgccgtcagccccggag  |
| -1901—2001sit  | atatcgggattaccggcccgg   | gggctgggcttcttcttgggtg |
